# Supplementary material
Source: publisher figshare collection journal article supplement (https://tandf.figshare.com/articles/dataset/_/8287718)
Supplement: Supplementary file 1 [file 1]

Table S1 Primers and gene ID used in this study

| Name    | ID_Zm00001d.1  | ID_V3         | Localization Maize V4     | Forward primer (5'-3')    | Reverse primer (5'-3')   |
|---------|----------------|---------------|---------------------------|---------------------------|--------------------------|
| ZmPIN1a | Zm00001d044812 | GRMZM2G098643 | Chr9: 3291763-3295059     | CGGATAATCGCGTGCGGGAACA    | CCGAAGATGACTGCCGTGCTGA   |
| ZmPIN1b | Zm00001d018024 | GRMZM2G074267 | Chr5: 212254262-212257744 | GCCATGTTCACTCTCGGGCTGTT   | CGGTGCTGAGAATGTCAGGGTGC  |
| ZmPIN1c | Zm00001d052269 | GRMZM2G149184 | Chr4: 185371637-185375098 | TCATCGCGTGCGGGAACAAG      | ACGGCTGTGCTCAGGATGTCG    |
| ZmPIN1d | Zm00001d052442 | GRMZM2G171702 | Chr4: 190119181-190122383 | GTCCCTGGTCTCCTACAGGT      | ATGAACGCCGTACTCCTTGG     |
| ZmPIN3a | Zm00001d044083 | GRMZM2G126260 | Chr3: 218523216-218528077 | GTGCGGTTCCGGTGGCACAT      | GGCACGATCCCTTGCGGTAGAG   |
| ZmPIN3b | Zm00001d045219 | GRMZM2G160496 | Chr9: 16477975-16480410   | TCATCTCGTTCGATTCCACTTCG   | TGGTGCGGTGCAGGCTGTACTCT  |
| ZmPIN5a | Zm00001d042345 | GRMZM2G025742 | Chr3: 162347553-162351683 | CCAACAGGCTGCACATCGAG      | ACATCAGCGTGCAACCCATA     |
| ZmPIN5b | Zm00001d043660 | GRMZM5G839411 | Chr3: 206187330-206189862 | TGAAGCTATAGAATCAGGTACTCCA | ACGATTTTCGTTTGCAAGGC     |
| ZmPIN5c | Zm00001d031594 | GRMZM2G148648 | Chr1: 195810416-195812223 | CAACGTGGTGTGAGGAATGG      | GGTAGTTCATGGCGTAGGGG     |
| ZmPIN8  | Zm00001d006082 | GRMZM2G040911 | Chr2: 197602488-197606112 | TCGCCACGCTCAACAACACGC     | GGTTCCTCGCCACCTTCTTCCA   |
| ZmPIN9  | Zm00001d043179 | GRMZM5G859099 | Chr3: 190701685-190704770 | TCGCCATGTACGGCAAGTGGG     | CGTCGTCATCAGCGGCTTCCTC   |
| ZmAct1  | Zm00001d010159 | GRMZM2G126010 | Chr8: 102413407-102417640 | ATCACCATTGGGTCAGAAAGG     | GTGCTGAGAGAAGCCAAAATAGAG |
